# Supplementary material for: Does the Use of Local Antibiotics Affect Clinical Outcome of Patients with Fracture-Related Infection?
Source: MDPI journal article supplement (doi:10.3390/antibiotics11101330), 2022-09-29
Supplement: s1 [file s1]

**Table S1: The causative pathogens of the initial and recurrent FRI of all patients with a recurrent infection.**

| No. | ALC used | Type of surgery performed | Pathogen(s) initial FRI                                                                                             | Pathogen(s) recurrent FRI                                                                                            | Identical pathogen(s) at initial and recurrent FRI (yes/no) |
|-----|----------|---------------------------|---------------------------------------------------------------------------------------------------------------------|----------------------------------------------------------------------------------------------------------------------|-------------------------------------------------------------|
| 1   | Yes      | DAIR                      | <i>Escherichia coli</i><br><i>Enterococcus faecium</i>                                                              | <i>Escherichia coli</i>                                                                                              | Yes                                                         |
| 2   | Yes      | DAIR                      | <i>Staphylococcus aureus</i>                                                                                        | <i>Staphylococcus aureus</i>                                                                                         | Yes                                                         |
| 3   | Yes      | DAIR                      | <i>Enterobacter cloacae</i>                                                                                         | <i>Staphylococcus aureus</i><br><i>Staphylococcus epidermidis</i><br><i>Pseudomonas aeruginosa</i>                   | No                                                          |
| 4   | Yes      | DAIR                      | <i>Staphylococcus aureus</i><br><i>Finegoldia magna</i>                                                             | CN                                                                                                                   | No                                                          |
| 5   | Yes      | DAIR                      | <i>Streptococcus dysgalactiae</i>                                                                                   | <i>Streptococcus dysgalactiae</i>                                                                                    | Yes                                                         |
| 6   | Yes      | DAIR                      | <i>Enterococcus faecalis</i><br><i>Enterobacter cloacae</i>                                                         | <i>Enterococcus faecalis</i>                                                                                         | Yes                                                         |
| 7   | Yes      | External Fixation         | <i>Staphylococcus aureus</i><br><i>Enterococcus faecalis</i>                                                        | CN                                                                                                                   | No                                                          |
| 8   | Yes      | External Fixation         | <i>Staphylococcus aureus</i>                                                                                        | <i>Staphylococcus aureus</i>                                                                                         | Yes                                                         |
| 9   | Yes      | External Fixation         | <i>Staphylococcus aureus</i> (MRSA)                                                                                 | <i>Staphylococcus aureus</i> (MSSA)                                                                                  | No                                                          |
| 10  | Yes      | External Fixation         | <i>Streptococcus pyogenes</i><br><i>Staphylococcus aureus</i>                                                       | CN                                                                                                                   | No                                                          |
| 11  | Yes      | External Fixation         | <i>Escherichia coli</i><br><i>Staphylococcus aureus</i><br><i>Streptococcus dysgalactiae</i>                        | <i>Escherichia coli</i>                                                                                              | Yes                                                         |
| 12  | Yes      | Internal Fixation         | <i>Enterococcus caselflavious</i>                                                                                   | CoNS                                                                                                                 | No                                                          |
| 13  | Yes      | Internal Fixation         | CN                                                                                                                  | <i>Enterobacter cloacae</i>                                                                                          | No                                                          |
| 14  | Yes      | Removal                   | <i>Escherichia coli</i><br><i>Klebsiella oxytoca</i><br><i>Dermabacter hominis</i>                                  | <i>Finegoldia magna</i>                                                                                              | No                                                          |
| 15  | Yes      | Removal                   | <i>Staphylococcus aureus</i>                                                                                        | <i>Staphylococcus aureus</i>                                                                                         | Yes                                                         |
| 16  | Yes      | Removal                   | <i>Staphylococcus aureus</i><br><i>Morganella morganii</i>                                                          | <i>Streptococcus agalactiae</i>                                                                                      | No                                                          |
| 17  | Yes      | Removal                   | <i>Escherichia coli</i><br><i>Enterococcus faecalis</i><br><i>Mixed anaerobes</i>                                   | <i>Staphylococcus aureus</i><br><i>Morganella morganii</i><br><i>Actinomyces spp.</i><br><i>Corynebacterium spp.</i> | No                                                          |
| 18  | Yes      | Removal                   | <i>Staphylococcus epidermidis</i>                                                                                   | CN                                                                                                                   | No                                                          |
| 19  | Yes      | Removal                   | <i>Staphylococcus aureus</i>                                                                                        | <i>Staphylococcus aureus</i>                                                                                         | Yes                                                         |
| 20  | Yes      | Removal                   | <i>Staphylococcus aureus</i>                                                                                        | CN                                                                                                                   | No                                                          |
| 21  | Yes      | Removal                   | CN                                                                                                                  | <i>Klebsiella oxytoca</i><br><i>Enterococcus faecalis</i>                                                            | No                                                          |
| 22  | Yes      | Removal                   | <i>Staphylococcus aureus</i>                                                                                        | <i>Staphylococcus aureus</i>                                                                                         | Yes                                                         |
| 23  | Yes      | Removal                   | <i>Staphylococcus epidermidis</i><br><i>Enterobacter cloacae</i>                                                    | <i>Staphylococcus aureus</i><br><i>Bacteroides spp.</i><br><i>Stenotrophomonas spp.</i><br><i>Anaerococcus spp.</i>  | No                                                          |
| 24  | Yes      | Removal                   | <i>Staphylococcus aureus</i><br><i>Escherichia coli</i><br><i>Enterococcus faecalis</i><br><i>Proteus mirabilis</i> | CN                                                                                                                   | No                                                          |

|    |     |         |                                                                                                                             |                                                                                                                                                                                                                         |     |
|----|-----|---------|-----------------------------------------------------------------------------------------------------------------------------|-------------------------------------------------------------------------------------------------------------------------------------------------------------------------------------------------------------------------|-----|
| 25 | Yes | Removal | CN                                                                                                                          | <i>Staphylococcus aureus</i>                                                                                                                                                                                            | No  |
| 26 | No  | DAIR    | <i>Corynebacterium amycolatum</i><br><i>Corynebacterium urealyticum</i>                                                     | CN                                                                                                                                                                                                                      | No  |
| 27 | No  | DAIR    | <i>Staphylococcus aureus</i>                                                                                                | <i>Pseudomonas aeruginosa</i>                                                                                                                                                                                           | No  |
| 28 | No  | DAIR    | <i>Staphylococcus aureus</i><br><i>Finegoldia magna</i>                                                                     | <i>Staphylococcus aureus</i>                                                                                                                                                                                            | Yes |
| 29 | No  | DAIR    | <i>Staphylococcus aureus</i><br><i>Finegoldia magna</i><br><i>Peptoniphilus harei</i>                                       | <i>Proteus mirabilis</i><br><i>Klebsiella pneumoniae</i><br><i>Morganella morganii</i>                                                                                                                                  | No  |
| 30 | No  | DAIR    | <i>Staphylococcus lugdunensis</i><br><i>Staphylococcus epidermidis</i><br><i>Streptococcus agalactiae</i>                   | <i>Staphylococcus lugdunensis</i><br><i>Cutibacterium acnes</i>                                                                                                                                                         | Yes |
| 31 | No  | DAIR    | <i>Pasteurella canis</i><br><i>Peptostreptococcus canis</i>                                                                 | <i>Staphylococcus lugdunensis</i><br><i>Corynebacterium auriscanis</i><br><i>Enterobacter cloacae</i><br><i>Staphylococcus pseudointermedius</i><br><i>Acinetobacter baumannii</i><br><i>Staphylococcus epidermidis</i> | No  |
| 32 | No  | DAIR    | <i>Staphylococcus aureus</i>                                                                                                | <i>Staphylococcus aureus</i><br><i>Finegoldia magna</i>                                                                                                                                                                 | Yes |
| 33 | No  | DAIR    | <i>Staphylococcus aureus</i>                                                                                                | CN                                                                                                                                                                                                                      | No  |
| 34 | No  | DAIR    | <i>Rhodococcus hoagii (equi)</i>                                                                                            | CN                                                                                                                                                                                                                      | No  |
| 35 | No  | DAIR    | <i>Staphylococcus aureus</i>                                                                                                | <i>Staphylococcus hominis</i><br><i>Paenibacillus species</i>                                                                                                                                                           | No  |
| 36 | No  | DAIR    | <i>Staphylococcus aureus</i><br><i>Staphylococcus caprae</i><br><i>Corynebacterium amycolatum</i>                           | <i>Staphylococcus epidermidis</i><br><i>Escherichia coli</i>                                                                                                                                                            | No  |
| 37 | No  | DAIR    | <i>Serratia marcescens</i><br><i>Staphylococcus epidermidis</i><br><i>Peptoniphilus gorbachii</i>                           | <i>Serratia marcescens</i><br><i>Streptococcus dysgalactiae</i>                                                                                                                                                         | Yes |
| 38 | No  | DAIR    | <i>Staphylococcus aureus</i><br><i>Porphyromonas uenonis</i><br><i>Prevotella bivia</i><br><i>Dialister microaerophilus</i> | <i>Staphylococcus aureus</i><br><i>Streptococcus mitis</i><br><i>Actinomyces odontolyticus</i><br><i>Prevotella melaninogenica</i><br><i>Parvimonas micra</i><br><i>Veillonella parvula</i>                             | Yes |
| 39 | No  | DAIR    | <i>Staphylococcus aureus</i>                                                                                                | <i>Staphylococcus haemolyticus</i>                                                                                                                                                                                      | No  |
| 40 | No  | DAIR    | <i>Staphylococcus aureus</i>                                                                                                | <i>Escherichia coli</i>                                                                                                                                                                                                 | No  |
| 41 | No  | DAIR    | <i>Staphylococcus aureus</i><br><i>Peptostreptococcus anaerobius</i>                                                        | <i>Haemophilis parainfluenza</i><br><i>Staphylococcus epidermidis</i>                                                                                                                                                   | No  |
| 42 | No  | DAIR    | <i>Actinomyces neuii</i>                                                                                                    | <i>Dermabacter hominis</i><br><i>Cutibacterium acnes</i>                                                                                                                                                                | No  |
| 43 | No  | DAIR    | <i>Staphylococcus aureus</i><br><i>Streptococcus pyogenes</i>                                                               | <i>Staphylococcus hominis</i>                                                                                                                                                                                           | No  |
| 44 | No  | DAIR    | CN                                                                                                                          | <i>Streptococcus agalactiae</i>                                                                                                                                                                                         | No  |
| 45 | No  | DAIR    | <i>Staphylococcus aureus</i><br><i>Micrococcus luteus</i>                                                                   | CN                                                                                                                                                                                                                      | No  |
| 46 | No  | DAIR    | <i>Staphylococcus lugdunensis</i><br><i>Corynebacterium simulans</i>                                                        | <i>Staphylococcus hominis</i><br><i>Staphylococcus equorum</i><br><i>Kocuria rhizophila</i><br><i>Micrococcus luteus</i>                                                                                                | No  |
| 47 | No  | DAIR    | <i>Streptococcus dysgalactiae</i>                                                                                           | CN                                                                                                                                                                                                                      | No  |

|    |    |                   |                                                                                                                                                          |                                                                                                 |     |
|----|----|-------------------|----------------------------------------------------------------------------------------------------------------------------------------------------------|-------------------------------------------------------------------------------------------------|-----|
| 48 | No | DAIR              | <i>Staphylococcus aureus</i><br><i>Cutibacterium acnes</i><br><i>Streptococcus mitis</i><br><i>Finegoldia Magna</i><br><i>Staphylococcus lugdenensis</i> | <i>Staphylococcus aureus</i><br><i>Cutibacterium acnes</i>                                      | Yes |
| 49 | No | DAIR              | <i>Staphylococcus aureus</i>                                                                                                                             | CN                                                                                              | No  |
| 50 | No | External Fixation | <i>Staphylococcus aureus</i>                                                                                                                             | CN                                                                                              | No  |
| 51 | No | External Fixation | CN                                                                                                                                                       | <i>Staphylococcus epidermidis</i>                                                               | No  |
| 52 | No | Internal Fixation | <i>Staphylococcus epidermidis</i><br><i>Staphylococcus capitis</i>                                                                                       | <i>Staphylococcus epidermidis</i><br><i>Cutibacterium acnes</i>                                 | Yes |
| 53 | No | Removal           | <i>Staphylococcus epidermidis</i>                                                                                                                        | <i>Streptococcus spp.</i>                                                                       | No  |
| 54 | No | Removal           | <i>Staphylococcus aureus</i>                                                                                                                             | <i>Staphylococcus epidermidis</i><br><i>Streptococcus agalactiae</i><br><i>Finegoldia magna</i> | No  |
| 55 | No | Removal           | <i>Finegoldia magna</i><br><i>Staphylococcus lugdunensis</i>                                                                                             | <i>Staphylococcus aureus</i>                                                                    | No  |
| 56 | No | Removal           | CN                                                                                                                                                       | CN                                                                                              | No  |
| 57 | No | Removal           | <i>Staphylococcus epidermidis</i><br><i>Pseudomonas aeruginosa</i>                                                                                       | <i>Staphylococcus epidermidis</i><br><i>Pseudomonas aeruginosa</i>                              | Yes |
| 58 | No | Removal           | <i>Escherichia coli</i><br><i>Enterococcus faecalis</i><br><i>Staphylococcus aureus</i><br><i>Finegoldia magna</i>                                       | <i>Escherichia coli</i>                                                                         | Yes |
| 59 | No | Removal           | <i>Staphylococcus epidermidis</i><br><i>Corynebacterium tuberculostearicum</i><br><i>Staphylococcus aureus</i>                                           | <i>Staphylococcus epidermidis</i>                                                               | Yes |

CoNS: coagulase negative staphylococci; DAIR: debridement, antibiotics and implant retention; CN: culture negative; spp.: species.

Identical pathogen, isolated at the initial FRI treatment and at the time of recurrence, were found in 10/34 (29.4%) of cases in the non-ALC group and in 9/25 (36.0%) of cases in the ALC group.
