# Supplementary figures and images for: Does the Use of Local Antibiotics Affect Clinical Outcome of Patients with Fracture-Related Infection?
Source: MDPI journal article supplement (doi:10.3390/antibiotics11101330), 2022-09-29

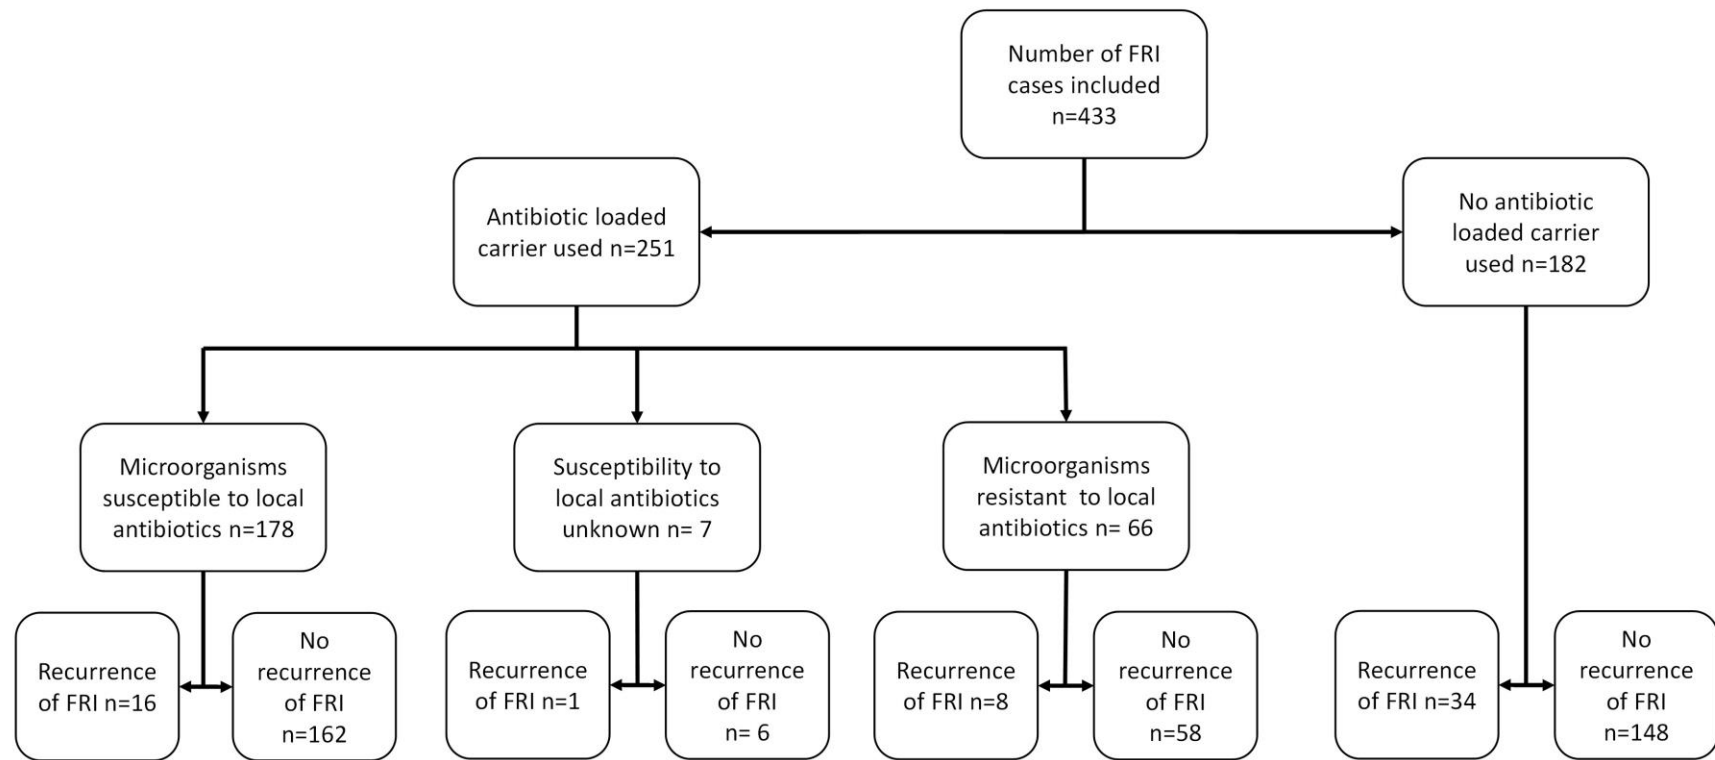

Figure S1. A flowchart of the outcome of FRI according to the use of- and susceptibility to ALCs.

Supplement: s1 [file s1]
